# Supplementary material for: More water-soluble brown carbon after the residential “coal-to-gas” conversion measure in urban Beijing
Source: Springer Nature journal article supplement (doi:10.1038/s41612-023-00355-w), 2023-03-23
Supplement: 41612_2023_355_MOESM1_ESM.pdf [file 41612_2023_355_MOESM1_ESM.pdf]

*Supplementary Information for*

**More water-soluble brown carbon after the residential “coal-to-gas”  
conversion measure in urban Beijing**

Wei Yuan<sup>1,2</sup>, Ru-Jin Huang<sup>1,2,3\*</sup>, Jincan Shen<sup>4</sup>, Kai Wang<sup>5</sup>, Lu Yang<sup>1,2</sup>, Ting Wang<sup>1</sup>, Yuquan Gong<sup>1,2</sup>, Wenjuan Cao<sup>1</sup>, Jie Guo<sup>1</sup>, Haiyan Ni<sup>1</sup>, Jing Duan<sup>1</sup>, Thorsten Hoffmann<sup>6</sup>

<sup>1</sup>State Key Laboratory of Loess and Quaternary Geology, Center for Excellence in Quaternary Science and Global Change, Institute of Earth Environment, Chinese Academy of Sciences, Xi’an 710061, China

<sup>2</sup>University of Chinese Academy of Sciences, Beijing 100049, China

<sup>3</sup>Laoshan Laboratory, Qingdao 266061, China

<sup>4</sup>Key Laboratory of Detection Technology R&D on Food Safety, Food Inspection and Quarantine Technology Center of Shenzhen Customs, Shenzhen 518045, China

<sup>5</sup>Key Laboratory of Plant-Soil Interactions of MOE, College of Resources and Environmental Sciences, National Academy of Agriculture Green Development, China Agricultural University, Beijing 100193, China

<sup>6</sup>Department of Chemistry, Johannes Gutenberg University of Mainz, Duesbergweg 10-14, 55128 Mainz, Germany

\*Correspondence: Ru-Jin Huang ([rujin.huang@ieecas.cn](mailto:rujin.huang@ieecas.cn))

**Supplementary Information consists of 1 note, 2 tables and 15 figures.**

## Supplementary Note 1

### Calculation of average element composition characteristics

The peak abundance-weighted average molecular mass ( $MM_{avg}$ ), elemental ratios ( $O/C_{avg}$  and  $H/C_{avg}$ ), double bond equivalent ( $DBE_{avg}$ ) and aromaticity equivalent ( $Xc_{avg}$ ) for the formula  $CcHhOoNnSs$  were calculated using following equations.

$$MM_{avg} = \sum(MM_i \times Int_i) / \sum Int_i \quad (1)$$

$$O/C_{avg} = \sum(O/C_i \times Int_i) / \sum Int_i \quad (2)$$

$$H/C_{avg} = \sum(H/C_i \times Int_i) / \sum Int_i \quad (3)$$

$$DBE_{avg} = \sum(DBE_i \times Int_i) / \sum Int_i \quad (4)$$

$$Xc_{avg} = \sum(X_{C_i} \times Int_i) / \sum Int_i \quad (5)$$

Here  $Int_i$  is the peak intensity for each individual chromophore  $i$ .

## Supplementary Tables

**Supplementary Table 1.** The peak intensity-weighted average molecular formulas ( $MF_{avg}$ ), molecular mass ( $MM_{avg}$ ), elemental ratios, double bond equivalent ( $DBE_{avg}$ ) and aromaticity equivalent ( $Xc_{avg}$ ) for chromophores in HULIS-BrC and WI-BrC fractions before (2015) and after (2019) “coal-to-gas” conversion measure.

| Samples         | Elemental composition | $MF_{avg}$                                   | $MM_{avg}$ | O/ $C_{avg}$ | H/ $C_{avg}$ | $DBE_{avg}$ | $Xc_{avg}$ |
|-----------------|-----------------------|----------------------------------------------|------------|--------------|--------------|-------------|------------|
| 2015            | Total                 |                                              | 175.63     | 0.43         | 0.89         | 6.14        | 2.49       |
| HULIS-BrC (-)   | CHON (-)              | $C_{7.67}H_{7.21}O_{3.50}N_{1.11}$           | 169.82     | 0.47         | 0.94         | 5.62        | 2.45       |
|                 | CHO (-)               | $C_{9.85}H_{8.21}O_{3.43}$                   | 180.31     | 0.36         | 0.84         | 6.74        | 2.56       |
|                 | CHOS (-)              | $C_{8.65}H_{7.17}O_{5.04}S_{1.00}$           | 222.61     | 0.60         | 0.84         | 6.06        | 2.21       |
|                 | CHONS (-)             | $C_{7.85}H_{7.86}O_{6.16}N_{1.09}S_{1.00}$   | 246.92     | 0.82         | 0.99         | 5.47        | 1.73       |
| 2019            | Total                 |                                              | 176.51     | 0.44         | 0.88         | 6.13        | 2.49       |
| HULIS-BrC (-)   | CHON (-)              | $C_{7.62}H_{7.06}O_{3.59}N_{1.18}$           | 171.45     | 0.49         | 0.92         | 5.67        | 2.45       |
|                 | CHO (-)               | $C_{9.66}H_{8.05}O_{3.60}$                   | 180.51     | 0.39         | 0.84         | 6.63        | 2.55       |
|                 | CHOS (-)              | $C_{8.67}H_{7.50}O_{5.22}S_{1.00}$           | 226.01     | 0.63         | 0.88         | 5.92        | 2.05       |
|                 | CHONS (-)             | $C_{7.38}H_{6.88}O_{5.77}N_{1.10}S_{1.00}$   | 234.16     | 0.84         | 0.93         | 5.49        | 1.76       |
| 2015            | Total                 |                                              | 176.69     | 0.19         | 0.86         | 7.36        | 2.55       |
| HULIS-BrC (+)   | CHON (+)              | $C_{10.21}H_{9.96}O_{1.95}N_{1.30}$          | 182.95     | 0.19         | 0.97         | 6.88        | 2.51       |
|                 | CHO (+)               | $C_{10.86}H_{7.98}O_{2.56}$                  | 180.21     | 0.25         | 0.74         | 7.87        | 2.54       |
|                 | CHN (+)               | $C_{10.03}H_{9.42}N_{1.31}$                  | 149.21     | 0.00         | 0.94         | 6.97        | 2.71       |
|                 | CHOS (+)              | $C_{11.64}H_{7.00}O_{1.71}S_{1.00}$          | 207.09     | 0.20         | 0.62         | 9.14        | 2.48       |
|                 | CHONS (+)             | $C_{9.90}H_{7.64}O_{4.60}N_{2.12}S_{1.00}$   | 262.74     | 0.53         | 0.73         | 8.14        | 2.42       |
| 2019            | Total                 |                                              | 179.01     | 0.22         | 0.87         | 7.22        | 2.49       |
| HULIS-BrC (+)   | CHON (+)              | $C_{10.13}H_{10.12}O_{2.24}N_{1.38}$         | 187.85     | 0.22         | 1.0          | 6.76        | 2.44       |
|                 | CHO (+)               | $C_{10.56}H_{7.79}O_{2.74}$                  | 179.45     | 0.27         | 0.74         | 7.66        | 2.48       |
|                 | CHN (+)               | $C_{9.98}H_{9.42}N_{1.40}$                   | 149.81     | 0.00         | 0.94         | 6.97        | 2.71       |
|                 | CHOS (+)              | $C_{14.29}H_{9.56}O_{1.44}S_{1.00}$          | 237.14     | 0.15         | 0.65         | 10.51       | 2.61       |
|                 | CHONS (+)             | $C_{10.71}H_{8.16}O_{4.33}N_{2.20}S_{1.00}$  | 269.75     | 0.50         | 0.71         | 8.73        | 2.57       |
| 2015 WI-BrC (-) | Total                 |                                              | 188.95     | 0.36         | 0.90         | 7.03        | 2.55       |
| HULIS-BrC (-)   | CHON (-)              | $C_{8.80}H_{8.81}O_{3.47}N_{1.10}$           | 184.35     | 0.42         | 1.01         | 5.94        | 2.46       |
|                 | CHO (-)               | $C_{11.56}H_{8.81}O_{2.93}$                  | 193.39     | 0.29         | 0.78         | 8.15        | 2.64       |
|                 | CHOS (-)              | $C_{8.17}H_{7.48}O_{5.49}S_{1.00}$           | 224.32     | 0.69         | 0.91         | 5.43        | 1.95       |
|                 | CHONS (-)             | $C_{7.31}H_{6.53}O_{5.37}N_{1.00}S_{1.00}$   | 225.25     | 0.76         | 0.89         | 5.55        | 1.79       |
| 2019 WI-BrC (-) | Total                 |                                              | 187.29     | 0.38         | 0.89         | 6.91        | 2.54       |
| HULIS-BrC (-)   | CHON (-)              | $C_{8.56}H_{8.33}O_{3.62}N_{1.21}$           | 184.97     | 0.45         | 0.98         | 6.00        | 2.47       |
|                 | CHO (-)               | $C_{11.09}H_{8.56}O_{3.04}$                  | 189.36     | 0.31         | 0.79         | 7.81        | 2.62       |
|                 | CHOS (-)              | $C_{7.87}H_{7.30}O_{5.60}S_{1.00}$           | 222.41     | 0.73         | 0.92         | 5.22        | 1.85       |
|                 | CHONS (-)             | $C_{6.90}H_{6.03}O_{5.46}N_{1.03}S_{1.00}$   | 221.55     | 0.82         | 0.87         | 5.40        | 1.78       |
| 2015 WI-BrC (+) | Total                 |                                              | 205.87     | 0.09         | 0.86         | 9.36        | 2.70       |
| HULIS-BrC (+)   | CHON (+)              | $C_{13.06}H_{12.14}O_{1.78}N_{1.35}$         | 217.40     | 0.15         | 0.95         | 8.67        | 2.62       |
|                 | CHO (+)               | $C_{14.15}H_{9.80}O_{2.04}$                  | 213.32     | 0.16         | 0.69         | 10.25       | 2.70       |
|                 | CHN (+)               | $C_{13.21}H_{11.81}N_{1.42}$                 | 191.33     | 0.00         | 0.93         | 9.01        | 2.75       |
|                 | CH (+)                | $C_{15.87}H_{13.41}$                         | 204.99     | 0.00         | 0.88         | 10.17       | 2.78       |
|                 | CHOS (+)              | $C_{12.05}H_{11.42}O_{1.98}S_{1.00}$         | 220.74     | 0.24         | 0.84         | 7.34        | 2.36       |
|                 | CHONS (+)             | $C_{13.10}H_{15.51}O_{4.83}N_{2.05}S_{1.00}$ | 311.71     | 0.39         | 1.19         | 7.37        | 2.49       |
| 2019 WI-BrC (+) | Total                 |                                              | 204.05     | 0.11         | 0.89         | 8.94        | 2.66       |
| HULIS-BrC (+)   | CHON (+)              | $C_{12.52}H_{12.12}O_{1.95}N_{1.44}$         | 214.89     | 0.17         | 0.99         | 8.18        | 2.57       |
|                 | CHO (+)               | $C_{14.04}H_{9.54}O_{2.21}$                  | 214.45     | 0.18         | 0.68         | 10.27       | 2.67       |
|                 | CHN (+)               | $C_{12.36}H_{12.03}N_{1.64}$                 | 184.36     | 0.00         | 1.02         | 8.16        | 2.72       |
|                 | CH (+)                | $C_{16.16}H_{13.19}$                         | 208.18     | 0.00         | 0.85         | 10.56       | 2.79       |
|                 | CHOS (+)              | $C_{7.00}H_{4.00}O_{3.00}S_{1.00}$           | 169.00     | 0.43         | 0.57         | 6.00        | 2.00       |
|                 | CHONS (+)             | $C_{14.91}H_{17.39}O_{5.11}N_{2.07}S_{1.00}$ | 340.22     | 0.37         | 1.17         | 8.25        | 2.59       |

**Supplementary Table 2.** The light absorption coefficient at 365 nm ( $Abs_{365}$ ) and organic carbon (OC) concentration of selected samples in this study.

|                            | sample |      |      |      |      |      |
|----------------------------|--------|------|------|------|------|------|
| 2015                       | 1      | 2    | 3    | 4    | 5    | 6    |
| $Abs_{365}$ ( $M m^{-1}$ ) | 24.3   | 31.2 | 40.0 | 42.7 | 45.0 | 47.9 |
| OC ( $\mu g m^{-3}$ )      | 19.7   | 22.9 | 23.9 | 27.1 | 32.4 | 33.0 |
| 2019                       | 7      | 8    | 9    | 10   | 11   | 12   |
| $Abs_{365}$ ( $M m^{-1}$ ) | 10.6   | 12.1 | 15.6 | 16.6 | 21.7 | 24.7 |
| OC ( $\mu g m^{-3}$ )      | 15.0   | 12.7 | 18.2 | 15.4 | 18.2 | 21.9 |

## Supplementary Figures

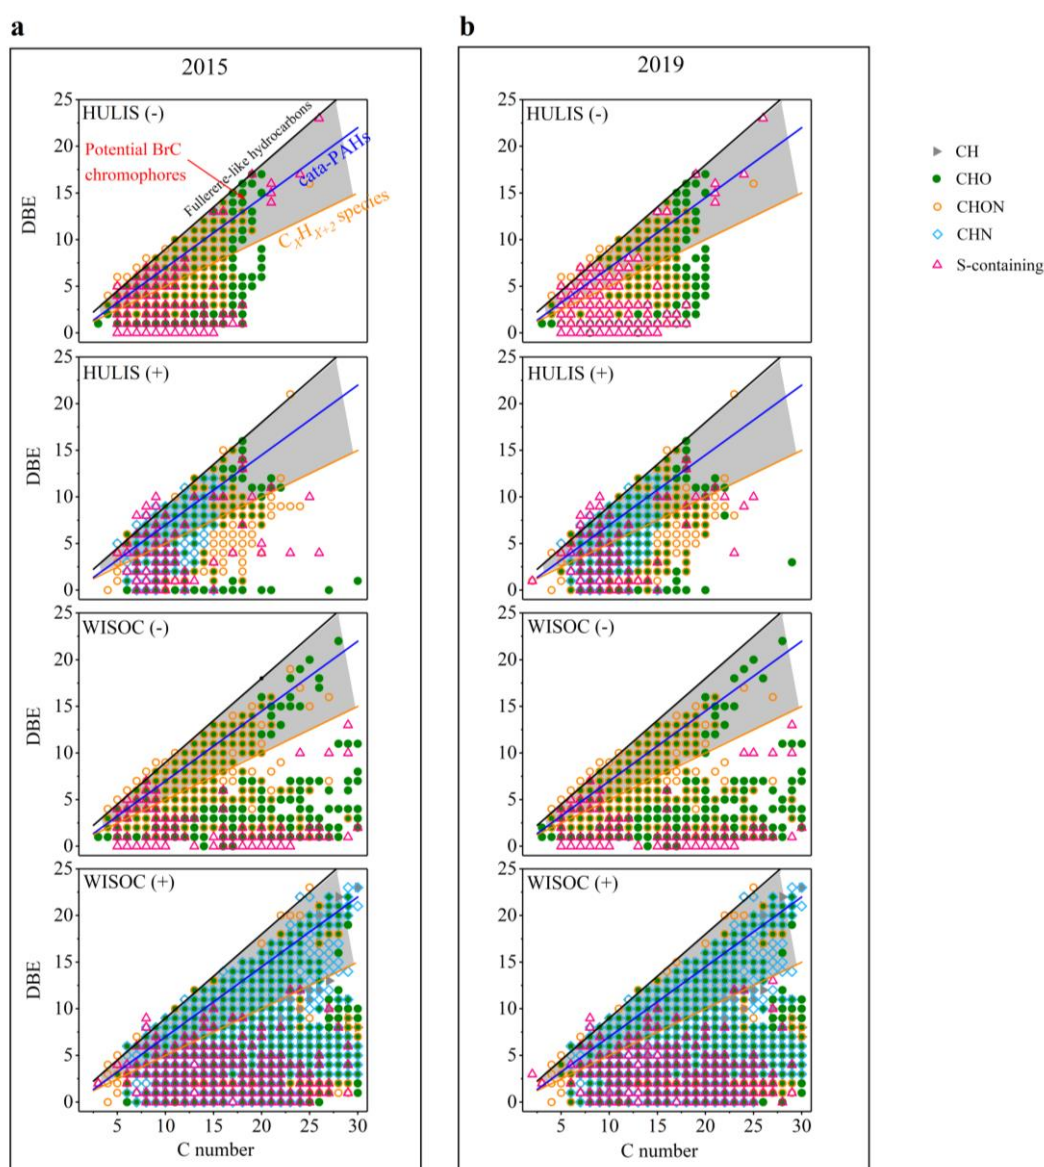

**Supplementary Figure 1. Plot of the double bond equivalent (DBE) vs number of carbon atoms in identified compounds in HULIS and WISOC fractions. Compounds identified **a** before (2015) and **b** after (2019) the “coal-to-gas” conversion measure. Lines indicate DBE reference values of linear conjugated polyenes C<sub>x</sub>H<sub>x+2</sub> (yellow solid line), *cata*-condensed PAHs (blue solid line) and fullerene-like hydrocarbons with DBE=0.9\*C (gray solid line). Data points inside the gray shaded area are potential BrC chromophores.**

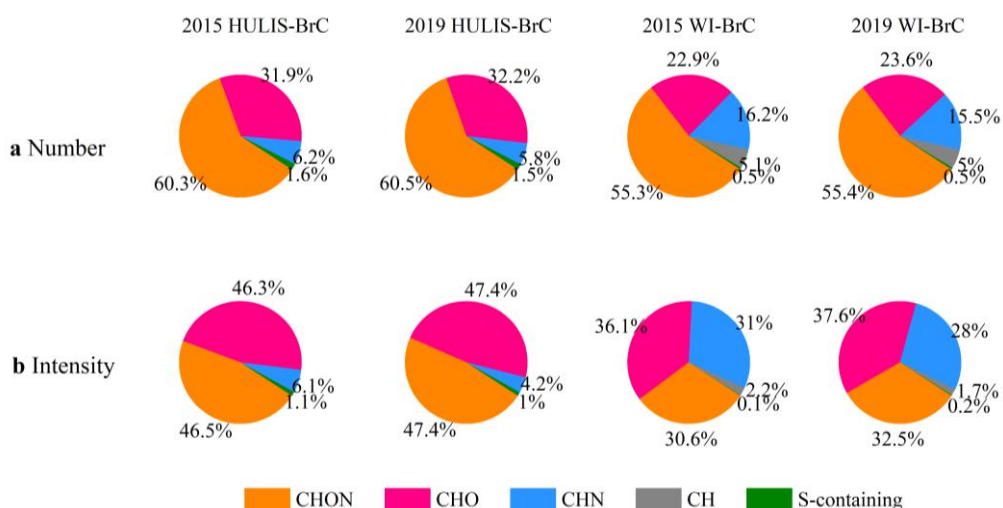

**Supplementary Figure 2. Proportions of chromophores in each compound category in HULIS-BrC and WI-BrC fractions before (2015) and after (2019) “coal-to-gas” conversion measure. Proportions of a number and b intensity.**

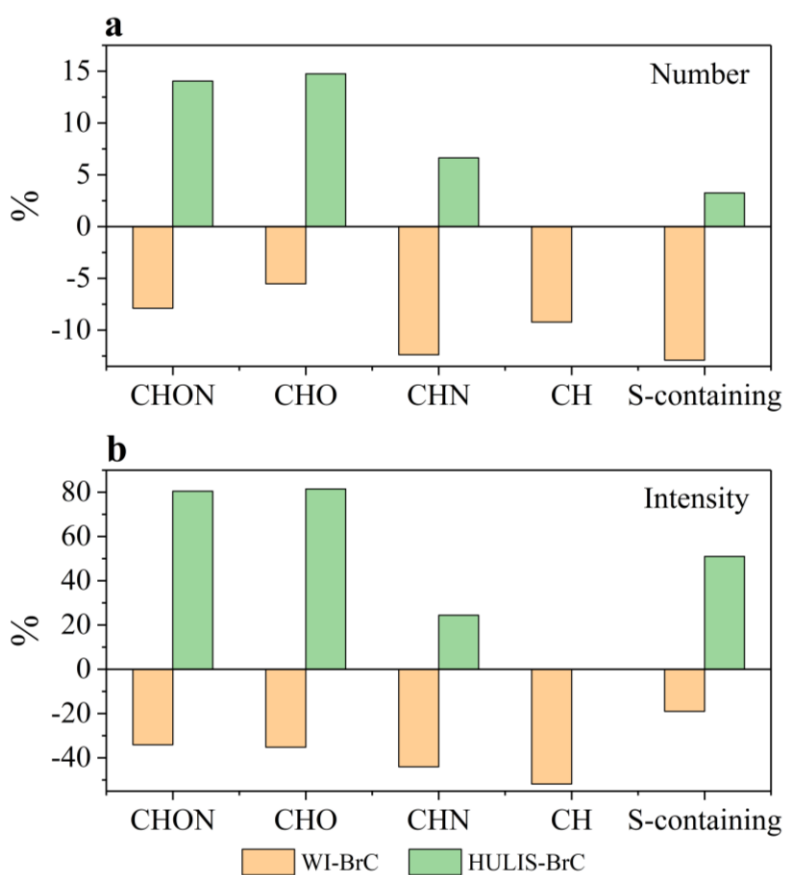

**Supplementary Figure 3. Changes ((2019-2015)/2015) of different compound categories in HULIS-BrC and WI-BrC fractions after “coal-to-gas” conversion measure. Changes in a number and b intensity.**

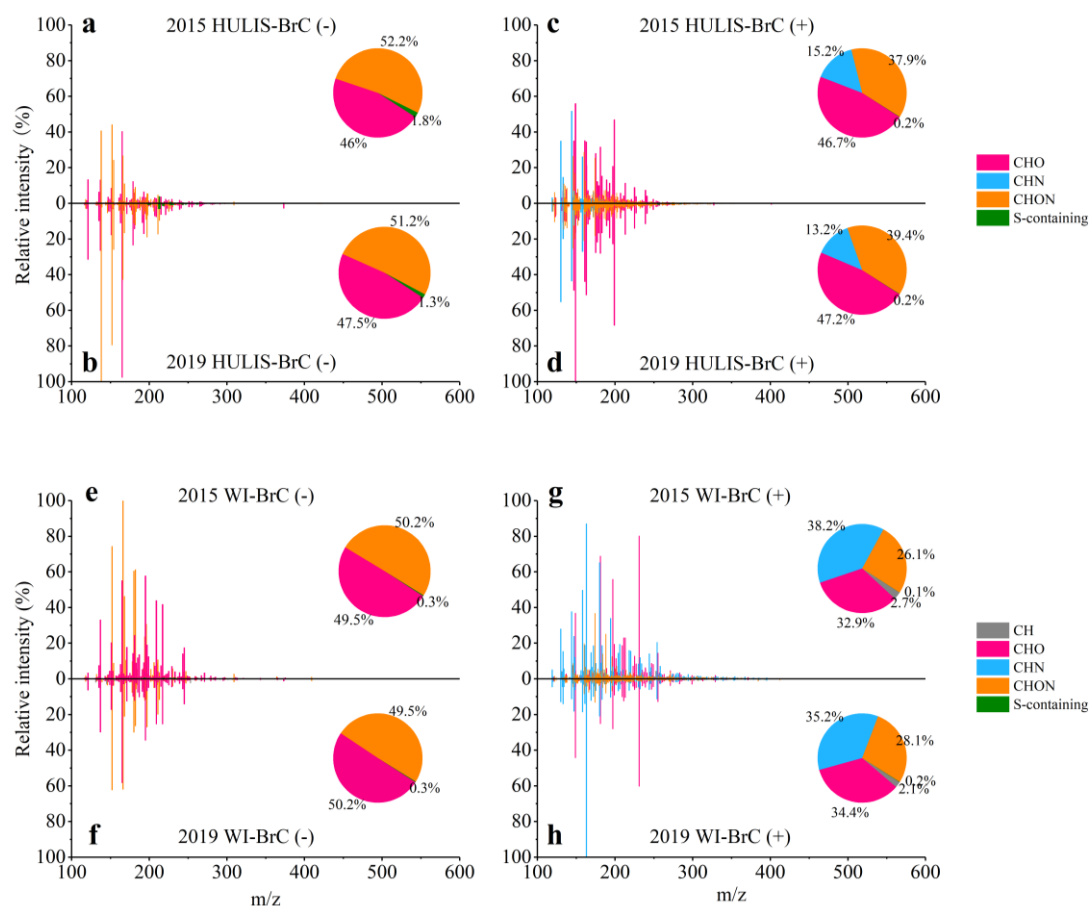

**Supplementary Figure 4. Mass spectra of CHO, CHON, CHN, CH, and S-containing chromophore categories before (2015) and after (2019) the “coal-to-gas” conversion measure. Chromophores identified in a, b HULIS-BrC (-), c, d HULIS-BrC (+), e, f WI-BrC (-) and g, h WI-BrC (+). The pie charts showed the relative intensities of different chromophore categories.**

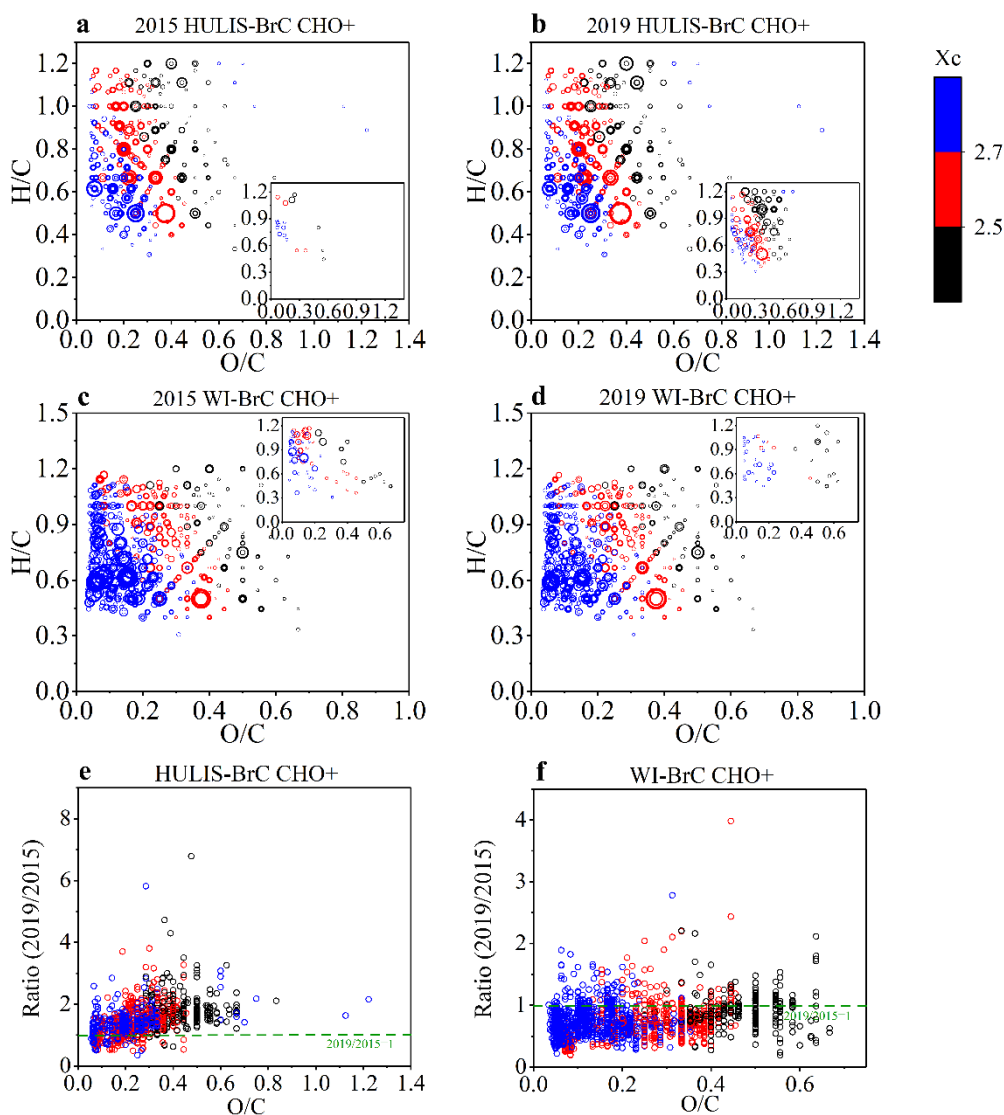

**Supplementary Figure 5. Characteristics of CHO<sup>+</sup> chromophores before (2015) and after (2019) the “coal-to-gas” conversion measure.** **a, b** Van Krevelen diagram for CHO<sup>+</sup> chromophores in HULIS-BrC fraction. **c, d** Similar to **(a, b)**, but in WI-BrC fraction. **e** Corresponding intensity ratios of after/before (2019/2015) the measure of CHO<sup>+</sup> chromophores in HULIS-BrC fraction. **f** Similar to **(e)**, but in WI-BrC fraction. The area of the circles is proportional to the fourth root of the intensity of individual chromophores and the color bar denotes the aromaticity equivalent (black with  $X_c < 2.5$ , red with  $2.5 \leq X_c < 2.7$ , and blue with  $X_c \geq 2.7$ ). The insert plot represents the chromophores identified only before or after the measure.



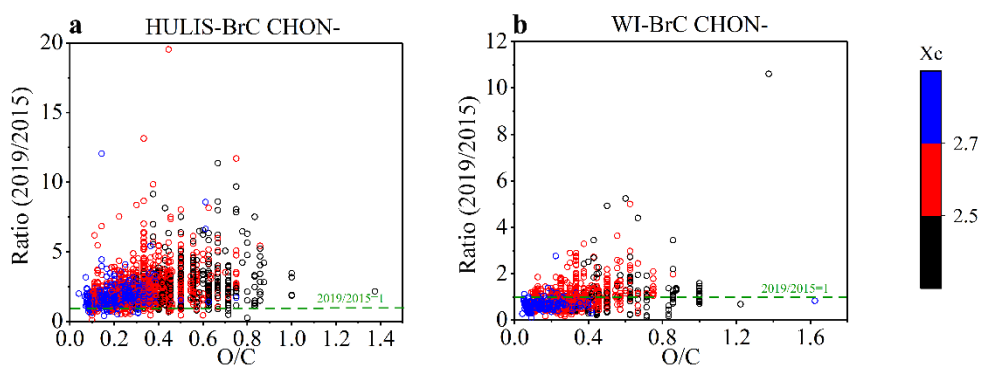

**Supplementary Figure 6. Corresponding intensity ratios of after/before (2019/2015) the “coal-to-gas” conversion measure of CHON- chromophores. Intensity ratios in a HULIS-BrC and b WI-BrC fractions.**

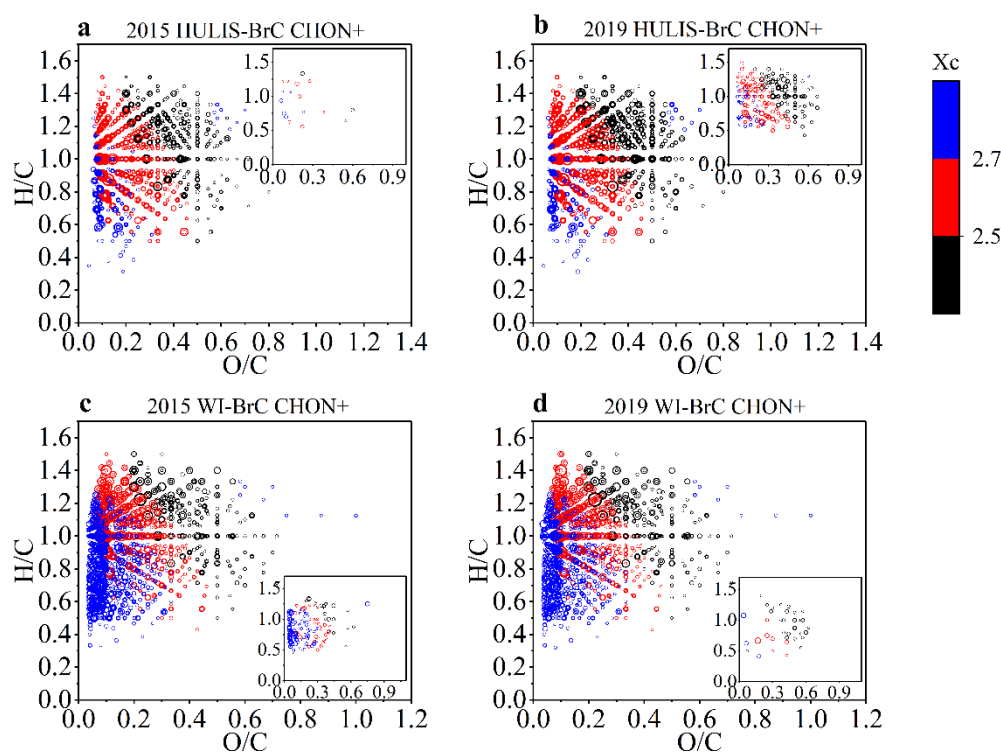

**Supplementary Figure 7. Van Krevelen diagram for CHON+ chromophores before (2015) and after (2019) the “coal-to-gas” conversion measure. a, b CHON+ chromophores in HULIS-BrC fraction. c, d CHON+ chromophores in WI-BrC fraction. The area of the circles is proportional to the fourth root of the intensity of individual chromophores and the color bar denotes the aromaticity equivalent (black with  $X_c < 2.5$ , red with  $2.5 \leq X_c < 2.7$ , and blue with  $X_c \geq 2.7$ ). The insert plot represents the chromophores identified only before or after the measure.**

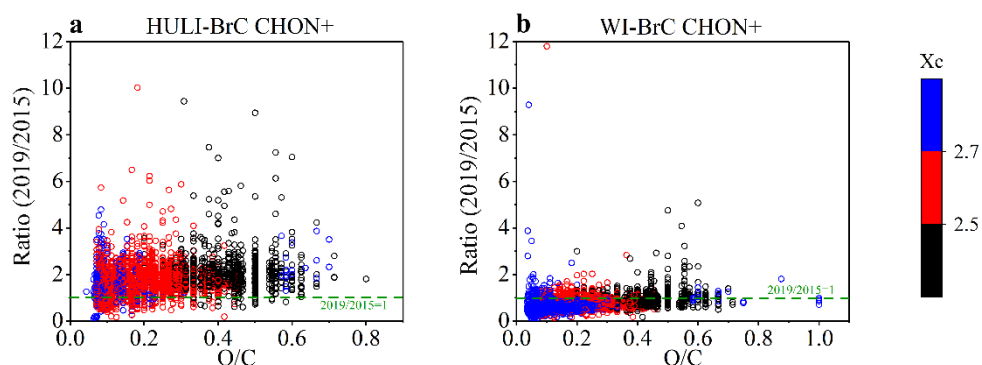

**Supplementary Figure 8. Corresponding intensity ratios of after/before (2019/2015) the “coal-to-gas” conversion measure of CHON+ chromophores. Intensity ratios in a HULIS-BrC and b WI-BrC fractions.**

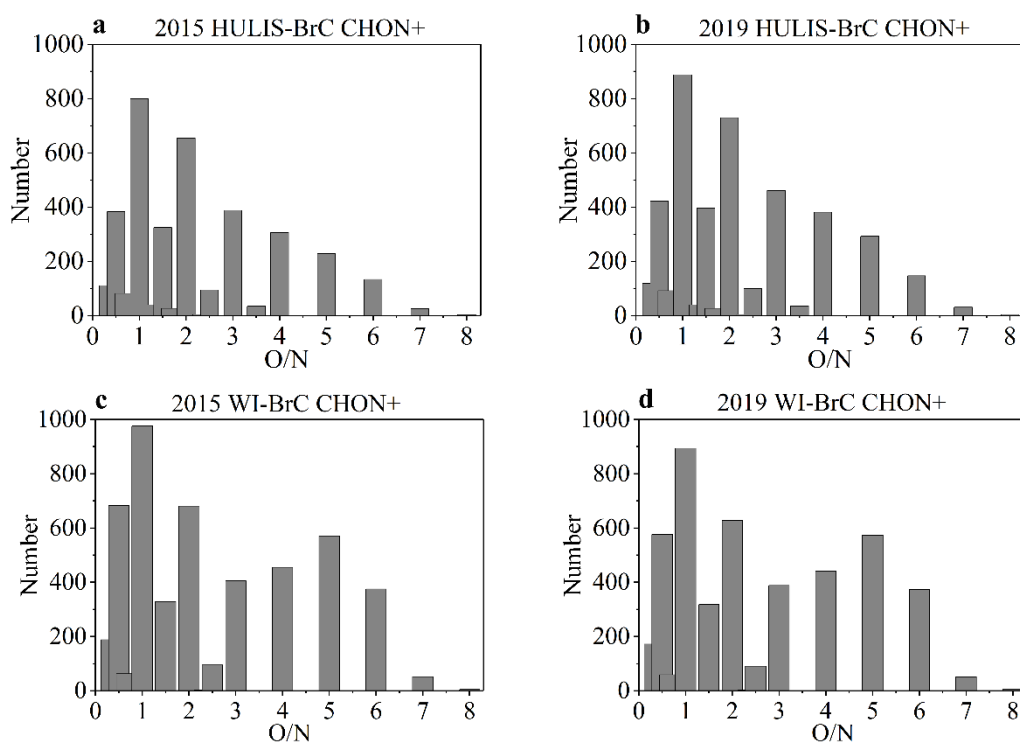

**Supplementary Figure 9. Number of different CHON+ chromophores subgroups classified according to O/N ratios in their formulas in HULIS-BrC and WI-BrC fractions. a, c Before (2015) the “coal-to-gas” conversion measure. b, d After (2019) the “coal-to-gas” conversion measure.**

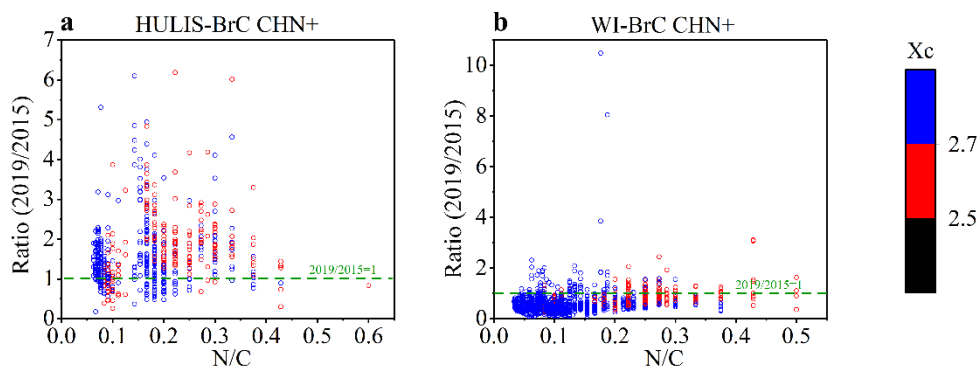

**Supplementary Figure 10. Corresponding intensity ratios of after/before (2019/2015) the “coal-to-gas” conversion measure of CHN+ chromophores.** Intensity ratios in **a** HULIS-BrC and **b** WI-BrC fractions.

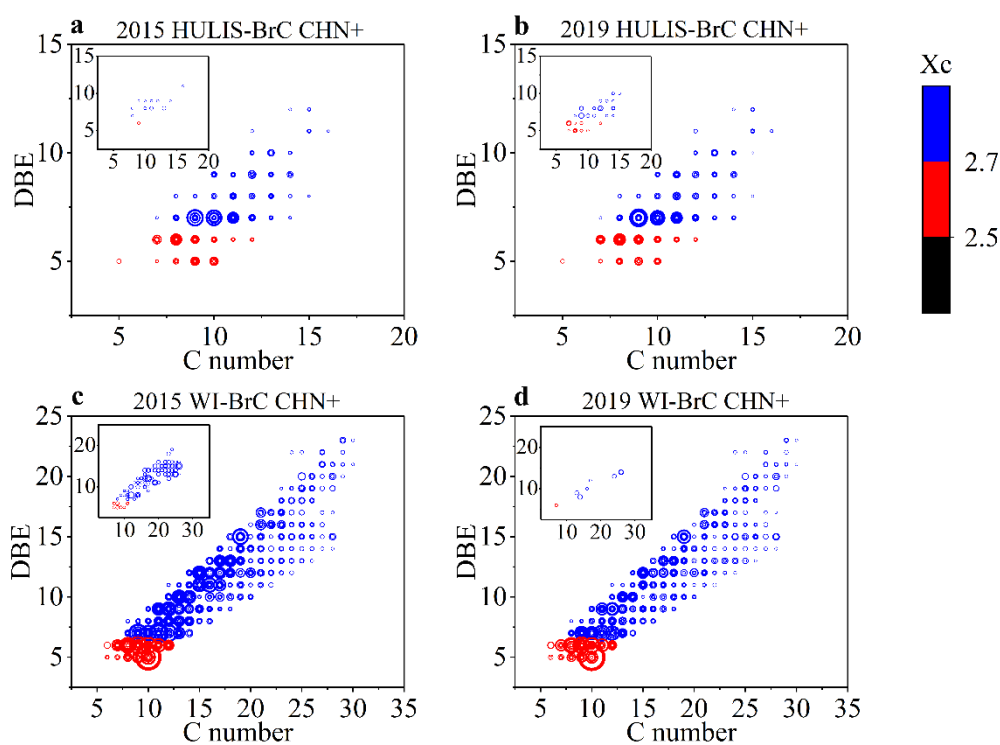

**Supplementary Figure 11. Characteristics of CHN+ chromophores before (2015) and after (2019) the “coal-to-gas” conversion measure.** Plot of the double bond equivalent (DBE) vs number of carbon atoms in identified CHN+ chromophores in **a, b** HULIS-BrC and **b, d** WI-BrC fractions. The area of the circles is proportional to the fourth root of the intensity of individual chromophores and the color bar denotes the aromaticity equivalent (black with  $X_c < 2.5$ , red with  $2.5 \leq X_c < 2.7$ , and blue with  $X_c \geq 2.7$ ). The insert plot represents the chromophores identified only before or after the measure.

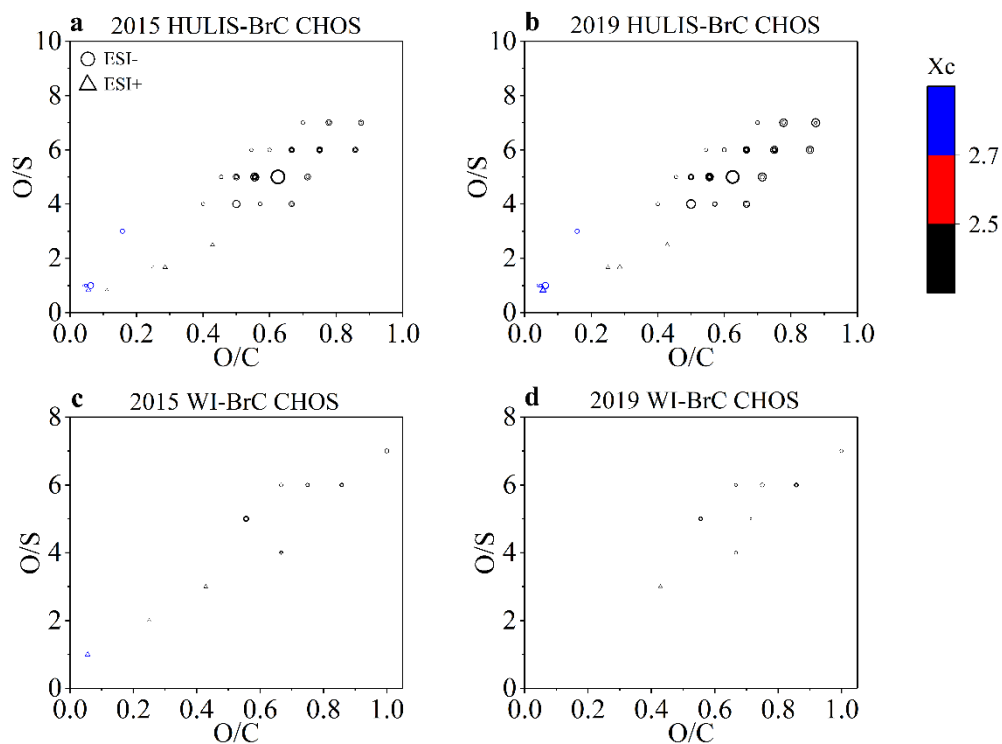

**Supplementary Figure 12. Van Krevelen diagram for CHOS chromophores assigned in HULIS-BrC and WI-BrC fractions. a, c** Before (2015) the “coal-to-gas” conversion measure. **b, d** After (2019) the “coal-to-gas” conversion measure. The area of the circles is proportional to the fourth root of the intensity of individual chromophores and the color bar denotes the aromaticity equivalent (black with  $X_c < 2.5$ , red with  $2.5 \leq X_c < 2.7$ , and blue with  $X_c \geq 2.7$ ).

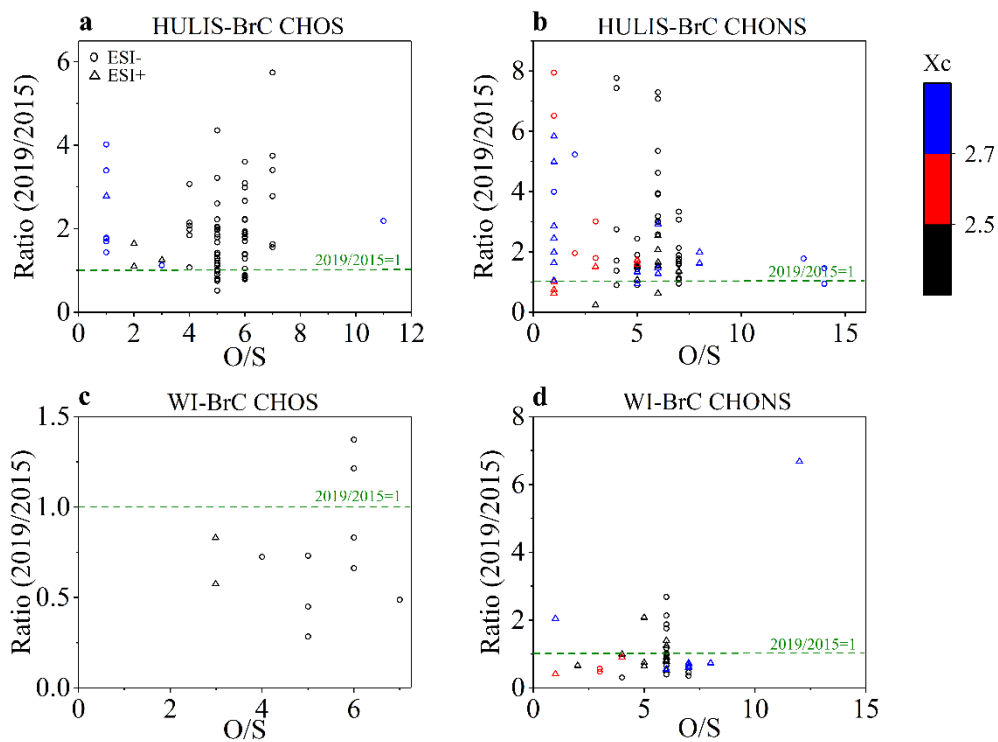

**Supplementary Figure 13. Corresponding intensity ratios of after/before (2019/2015) the “coal-to-gas” conversion measure of S-containing chromophores in HULIS-BrC and WI-BrC fractions. Intensity ratios of a, c CHOS and b, d CHONS chromophores.**

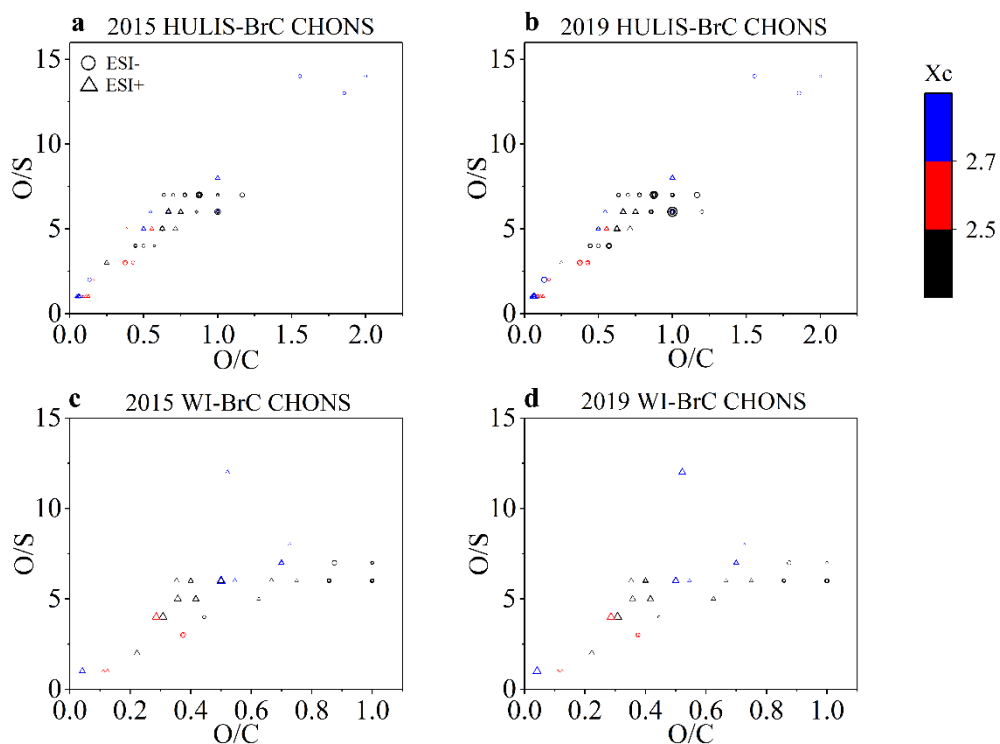

**Supplementary Figure 14. Van Krevelen diagram for CHONS chromophores before (2015) and after (2019) the “coal-to-gas” conversion measure. CHONS chromophores in a, b HULIS-BrC and c, d WI-BrC fractions. The area of the circles is proportional to the fourth root of the intensity of individual chromophores and the color bar denotes the aromaticity equivalent (black with  $X_c < 2.5$ , red with  $2.5 \leq X_c < 2.7$ , and blue with  $X_c \geq 2.7$ ).**

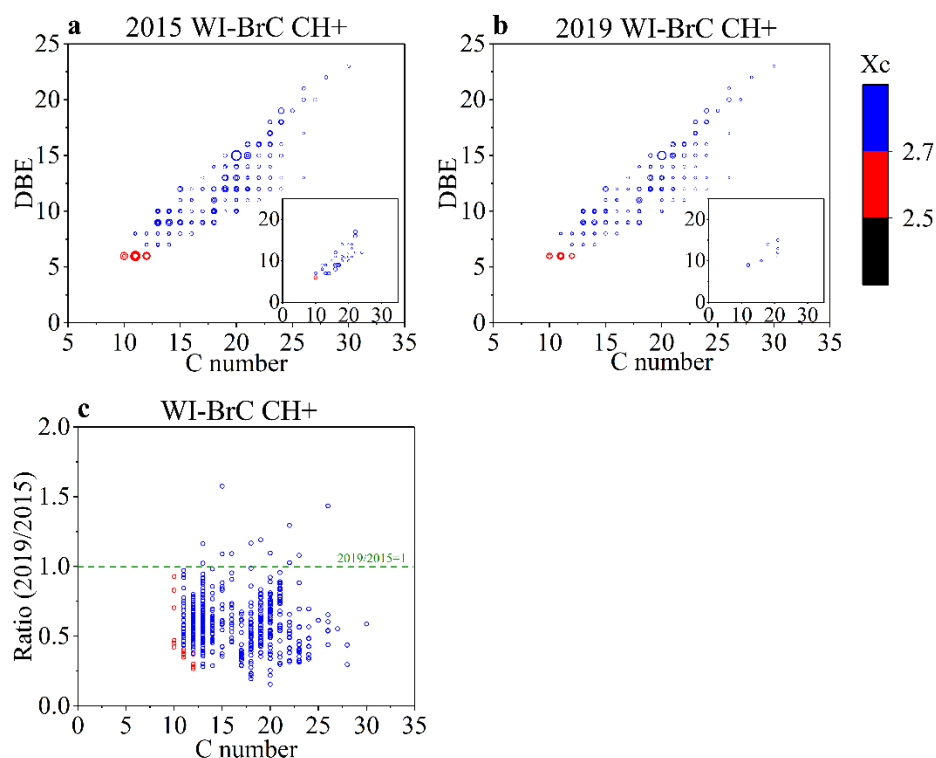

**Supplementary Figure 15. Characteristics of CH<sup>+</sup> chromophores in WI-BrC fraction. a**

Plot of the double bond equivalent (DBE) vs number of carbon atoms in identified CH<sup>+</sup> chromophores before (2015) the “coal-to-gas” conversion measure. **b** Similar to (a), but after (2019) the “coal-to-gas” conversion measure. **c** Corresponding intensity ratios of after/before (2019/2015) the measure of CH<sup>+</sup> chromophores. The area of the circles in a and b is proportional to the fourth root of the intensity of individual chromophores and the color bar denotes the aromaticity equivalent (black with  $X_c < 2.5$ , red with  $2.5 \leq X_c < 2.7$ , and blue with  $X_c \geq 2.7$ ). The insert plot represents the chromophores identified only before or after the measure.
